# Supplementary material for: Cognitive impairment and C-reactive protein in clinically stable schizophrenia outpatients: a focus on sex differences
Source: PubMed Central journal article supplement (PMC7524709; doi:10.1038/s41598-020-73043-x), 2020-09-29
Supplement: 41598_2020_73043_MOESM1_ESM.pdf [file 41598_2020_73043_MOESM1_ESM.pdf]

**Cognitive impairment and C-reactive protein in clinically stable schizophrenia outpatients: a focus on sex differences.**

Francesco Dal Santo, Leticia González-Blanco, Leticia García-Álvarez, Lorena de la Fuente-Tomás, Ángela Velasco, Clara María Álvarez-Vázquez, Clara Martínez-Cao, Pilar A. Sáiz, María Paz García-Portilla, Julio Bobes

## Supplementary Information

### Supplementary Table S1

Antipsychotic drug prescription in the sample (132 patients)

|                                                      | N  | %    |
|------------------------------------------------------|----|------|
| Number of antipsychotic drugs prescribed per patient |    |      |
| No antipsychotics                                    | 9  | 6.8  |
| 1 antipsychotic                                      | 77 | 58.3 |
| 2 antipsychotics                                     | 36 | 27.3 |
| >2 antipsychotics                                    | 10 | 7.6  |
| Antipsychotic drugs prescribed                       |    |      |
| Amisulpiride                                         | 4  | 3.0  |
| Aripiprazole                                         | 28 | 21.2 |
| Clotiapine                                           | 2  | 1.5  |
| Clozapine                                            | 7  | 5.3  |
| Fluphenazine                                         | 2  | 1.5  |
| Haloperidol                                          | 4  | 3.0  |
| Levomepromazine                                      | 1  | 0.8  |
| Olanzapine                                           | 36 | 27.3 |
| Paliperidone                                         | 64 | 48.5 |
| Quetiapine                                           | 14 | 10.6 |
| Risperidone                                          | 18 | 13.6 |
| Ziprasidone                                          | 1  | 0.8  |

## Supplementary Table S2

Correlation between visual learning (MCCB T-score), and psychopathological variables [r (p)]

|                | Men (n=82)            | Women (n=50)          |
|----------------|-----------------------|-----------------------|
| PANSS Positive | -0.155 (0.166)        | -0.198 (0.172)        |
| PANSS Negative | <b>-0.488 (0.000)</b> | <b>-0.376 (0.008)</b> |
| PANSS GP       | <b>-0.346 (0.001)</b> | <b>-0.320 (0.025)</b> |
| CAINS MAP      | <b>-0.597 (0.000)</b> | <b>-0.448 (0.001)</b> |
| CAINS EXP      | <b>-0.539 (0.000)</b> | <b>-0.340 (0.017)</b> |
| CDS            | 0.054 (0.627)         | -0.166 (0.253)        |

CAINS: Clinical Assessment Interview for Negative Symptoms, -EXP: Expression subscale, -MAP: Motivation and Pleasure subscale, CDS: Calgary Depression Scale, CRP: C-Reactive Protein; MCCB: MATRICS Consensus Cognitive Battery, PANSS: Positive and Negative Syndrome Scale, -GP: General Psychopathology
